# Supplementary material
Source: Copernicus journal article supplement (doi:10.5194/egusphere-2025-5867)
Supplement: Supplementary file 1 [file egusphere-2025-5867-supplement.pdf]

# Lake Surface Temperature Dynamics as Precursors to Glacial Lake Outburst Floods: A Case Study of Lake Merzbacher, Central Tianshan

Meixia Wang<sup>1,2</sup>, Donghui Shangguan<sup>1,2,3\*</sup>, Da Li<sup>1</sup>, Yaojun Li<sup>1</sup>, Rongjun Wang<sup>1</sup>,  
Asim Qayyum Butt<sup>1</sup>, Jinkui Wu<sup>1</sup>

<sup>1</sup> State Key Laboratory of Cryospheric Science and Frozen Soil Engineering/ Tanggula Mountain Cryosphere and Environment Observation and Research Station of Tibet Autonomous Region, Northwest Institute of Eco-Environment and Resources, Chinese Academy of Sciences, Lanzhou, 730000, China

<sup>2</sup> University of Chinese Academy of Sciences, Beijing, 101408, China

<sup>3</sup> China-Pakistan Joint Research Centre on Earth Sciences, CAS-HEC, Islamabad, 45320, Pakistan

Correspondence: Donghui Shangguan (dhguan@lzb.ac.cn).

## Contents of this file

Supplementary Figures S1-S2

Supplementary Table S1

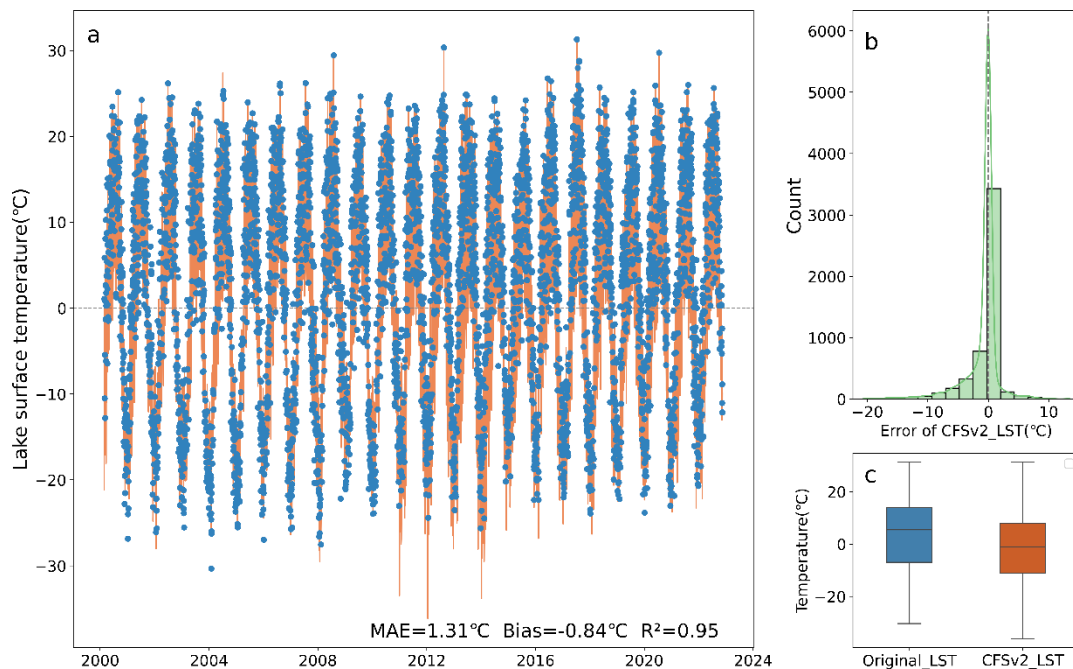

Figure S1. The relationship between the original LST (blue dot) and the filled LST (orange line) by CSFv2 model for the period 2000-2022 (a), error distribution of filled LST(CFSv2\_LST) (b), and distribution tendency between original LST and filled

23 LST(c).

24 Figure S1b shows the distribution of errors between the filled data and the original  
25 data. The errors are mainly concentrated in the range of  $-5^{\circ}\text{C}$  to  $5^{\circ}\text{C}$  and show a normal  
26 distribution trend, which indicates that the filling errors are small in most cases and  
27 there is no significant systematic bias. To further evaluate the temperature distribution  
28 characteristics of the filled data, box plots are used to compare the differences between  
29 the original LST and the filled LST (Figure S1). The median of the filled data is  
30 consistent with the original data, but the Interquartile Range (IQR) is relatively small,  
31 indicating that the temperature variation range of the filled data is slightly smaller than  
32 that of the original data. This may be due to the fact that filling methods tend to use  
33 information from adjacent time steps when processing missing data, thus smoothing  
34 out temperature changes to some extent. In addition, the extreme values of the filling  
35 data (up and down) show some shrinkage, which may indicate that the filling model  
36 has limited ability to capture abnormal temperature changes. Based on the above  
37 analysis, the LST data of CFSv2 method in this study shows high accuracy and stability  
38 on the whole. Its high  $R^2$  value and low MAE prove the validity of the filling method  
39 in the case of missing data, and it is suitable for the reconstruction of LST time series  
40 in glacial lakes.

41

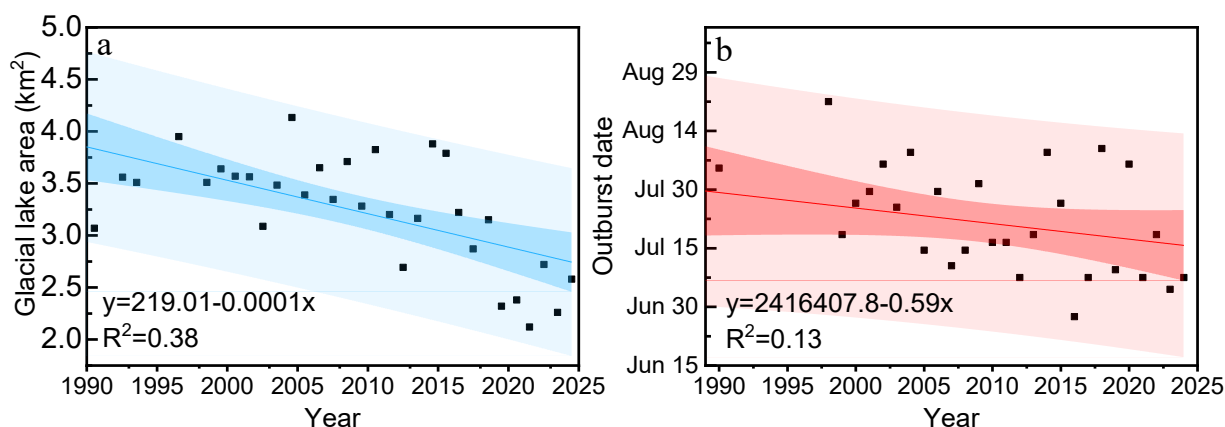

42

43 Figure S2. Lake area changes before the outburst of Lake Merzbacher from 1990 to  
44 2022 and the outburst dates of the glacial lake.

45

46 Table S1. The outburst dates of Lake Merzbacher

| No. | Year | Date     | Source            | No. | Year | Date     | Source            |
|-----|------|----------|-------------------|-----|------|----------|-------------------|
| 1   | 2000 | July, 27 | (Li et al., 2020) | 14  | 2011 | July, 19 | (Li et al., 2020) |
| 2   | 2001 | July, 31 | (Li et al., 2020) | 15  | 2012 | July, 8  | (Li et al., 2020) |

---

|    |      |             |                    |    |      |            |                   |
|----|------|-------------|--------------------|----|------|------------|-------------------|
| 3  | 2002 | August, 1   | (Li et al., 2020)  | 16 | 2013 | July, 17   | (Li et al., 2020) |
| 4  | 2003 | July, 22    | (Li et al., 2020)  | 17 | 2014 | August, 9  | (Li et al., 2020) |
| 5  | 2004 | August, 9   | (Li et al., 2020)  | 18 | 2015 | July, 27   | (Li et al., 2020) |
| 6  | 2004 | October, 13 | (Liu et al., 2023) | 19 | 2016 | June, 28   | This study        |
| 7  | 2005 | July, 15    | (Li et al., 2020)  | 20 | 2017 | July, 8    | This study        |
| 8  | 2006 | July, 30    | (Li et al., 2020)  | 21 | 2018 | August, 10 | This study        |
| 9  | 2007 | July, 11    | (Li et al., 2020)  | 22 | 2019 | July, 10   | This study        |
| 10 | 2008 | July, 15    | (Li et al., 2020)  | 23 | 2020 | August, 6  | This study        |
| 11 | 2009 | August, 1   | (Li et al., 2020)  | 24 | 2021 | July, 8    | This study        |
| 12 | 2010 | July, 17    | (Li et al., 2020)  | 25 | 2022 | July, 20   | This study        |
| 13 | 2010 | October, 12 | (Liu et al., 2023) |    |      |            |                   |

---

47

48 **References**

49 Li D, Shangguan D, Huang W 2020. Research on the area change of Lake Merzbacher  
50 in the Tianshan Mountains during 1998-2017. *Journal of Glaciology and*  
51 *Geocryology*, 42: 1126-1134.

52 Liu J, Li Z, Liu Y. Glacier dammed lake outburst flood in cold season in the Tien Shan,  
53 China and Kyrgyzstan[C]//,2023DOI:10.20944/preprints202310.1666.v1.

54
