# Supplementary material
Source: Copernicus journal article supplement (doi:10.5194/egusphere-2025-5867)
Supplement: Supplementary file [file egusphere-2025-5867-CC2-supplement.pdf]

1 **Lake Surface Temperature Dynamics as Precursors to Glacial Lake**  
2 **Outburst Floods: A Case Study of Lake Merzbacher, Central**  
3 **Tianshan**

4 Meixia Wang<sup>1,2</sup>, Donghui Shangguan<sup>1,2,3\*</sup>, Da Li<sup>1</sup>, Yaojun Li<sup>1</sup>, Rongjun Wang<sup>1</sup>,  
5 Asim Qayyum Butt<sup>1</sup>, Jinkui Wu<sup>1</sup>

6  
7 <sup>1</sup> State Key Laboratory of Cryospheric Science and Frozen Soil Engineering/ Tanggula  
8 Mountain Cryosphere and Environment Observation and Research Station of Tibet  
9 Autonomous Region, Northwest Institute of Eco-Environment and Resources,  
10 Chinese Academy of Sciences, Lanzhou, 730000, China

11 <sup>2</sup> University of Chinese Academy of Sciences, Beijing, 101408, China

12 <sup>3</sup> China-Pakistan Joint Research Centre on Earth Sciences, CAS-HEC, Islamabad,  
13 45320, Pakistan

14  
15 Correspondence: Donghui Shangguan ([dhguan@lzb.ac.cn](mailto:dhguan@lzb.ac.cn)).

16  
17 **Abstract**

18 Glacial lake outburst floods (GLOFs) have become increasingly frequent under climate  
19 warming, yet the extent to which lake surface temperature (LST) can provide diagnostic  
20 information on ice-dammed lake outbursts remains insufficiently understood. This  
21 study investigates the potential of MODIS-derived LST as a remotely sensed precursor  
22 for GLOFs at Lake Merzbacher, Kyrgyzstan, one of the most frequently outbursting  
23 ice-dammed lakes in central Tianshan Mountain. We analyzed LST trends from 2000  
24 to 2022 and examined short-term LST dynamics preceding 25 documented GLOF  
25 events. The results reveal a significant summer LST warming trend of  $0.06\text{ }^{\circ}\text{C yr}^{-1}$ ,  
26 exceeding the regional air temperature increase. Approximately 90% of GLOFs  
27 occurred when LST exceeded  $12\text{ }^{\circ}\text{C}$ , indicating that this value can be used as an  
28 empirical, site-specific LST reference level for identifying the warm-season window of  
29 elevated outburst likelihood, rather than as a deterministic trigger threshold. Distinct  
30 short-term thermal signals were also detected before outburst, including a rapid LST  
31 increase peaking at  $0.65\text{ }^{\circ}\text{C}\cdot\text{d}^{-1}$  around 8 days before drainage and an empirical  
32 acceleration signal exceeding  $1.04\text{ }^{\circ}\text{C}\cdot\text{d}^{-2}$  around 9 days before outburst. This study  
33 shows that MODIS-derived LST can provide supplementary diagnostic information for  
34 ice-dammed lake monitoring. We propose a multi-parameter framework integrating

35 LST, LST anomalies, the rate of LST change, LST acceleration, lake area, lake level or  
36 volume estimates, and ice-dam response indicators to support early-warning systems.  
37 In addition, peak discharge showed the strongest correlation with 15-day cumulative  
38 LST before outburst ( $r = 0.77$ ), suggesting that short-term surface thermal accumulation  
39 is statistically associated with flood magnitude. These results indicate that MODIS-  
40 derived LST can provide supplementary diagnostic information for ice-dammed lake  
41 monitoring. We propose a multi-parameter framework integrating LST, LST anomalies,  
42 LST change rate, LST acceleration, lake area, lake level or volume estimates, and ice-  
43 dam response indicators to support early-warning systems.

44

45 **Keywords:** Lake Merzbacher, GLOF, lake surface temperature, early warning, ice-  
46 dammed lake

47

## 48 **1. Introduction**

49 Glacial lake outburst floods (GLOFs) are increasingly recognized as a significant  
50 hazard in High Mountain Asia (HMA), where accelerated atmospheric warming has  
51 driven widespread glacier mass loss and rapid expansion of glacial lakes over recent  
52 decades (Hugonnet et al., 2021; Veh et al., 2023). In the Tianshan Mountains, where  
53 warming rates exceed  $0.3^{\circ}\text{C}$  per decade, glacier retreat has led to the formation and  
54 enlargement of numerous proglacial and ice-dammed lakes, elevating the risk of ice-  
55 dam failure and related floods (Wang et al., 2013; Chen et al., 2016). Ice-dammed lakes  
56 are particularly hazardous because they may drain suddenly and repeatedly, causing  
57 substantial economic damage and loss of life ((Carrivick and Tweed, 2016; Shangguan  
58 et al., 2017; Li et al., 2021). Although real-time monitoring systems have improved  
59 early warning capabilities (Zheng et al., 2021), predicting the timing of ice-dam failure  
60 remains difficult due to their complex and often inaccessible settings (Gu et al., 2023).

61 GLOF initiation can result from dynamic external disturbances such as rockfalls, ice  
62 avalanches, or rapid water input, as well as long-term processes that modify dam  
63 stability, including ice melt, permafrost degradation, and evolving subglacial hydrology  
64 (Richardson and Reynolds, 2000; Chikita and Yamada, 2005; Rounce et al., 2016).  
65 Among these drivers, air temperature has been widely linked to GLOFs through its  
66 control on glacier meltwater supply and internal ice-dam weakening (Ng et al., 2007;  
67 Ng and Liu, 2009). Yet, despite its acknowledged importance, the temperature  
68 sensitivity of ice-dammed lakes—and especially the direct response of lake surface

69 temperature (LST)—remains poorly quantified. The physical mechanism of GLOF  
70 initiation varies among lake types. Some glacial lakes drain by overtopping or overflow  
71 into supraglacial channels, whereas others may drain through mechanical dam  
72 instability or through the opening, connection, and enlargement of englacial or  
73 subglacial drainage pathways (Sattar et al., 2022; Remya et al., 2025). For ice-dammed  
74 lakes such as Lake Merzbacher, drainage is generally more closely linked to lake filling,  
75 increasing hydrostatic pressure, partial ice-dam flotation, and the development of  
76 englacial or subglacial conduits than to simple surface overflow or catastrophic dam  
77 collapse (Kingslake and Ng, 2013; Häusler et al., 2016).

78 Lake Merzbacher, located between the Northern and Southern Inylchek glaciers,  
79 represents one of the world’s most frequently draining ice-dammed lakes, with  
80 documented GLOFs since 1931 (Mayr et al., 2014). Annual outbursts typically occur  
81 between June and October, coinciding with peak meltwater supply during warm  
82 summer conditions (Ng and Liu, 2009). Previous studies have developed remote-  
83 sensing-based indices to identify pre-outburst signals (Xie et al., 2013) and have  
84 quantified the predictability of the timing of dam failure (Kingslake and Ng, 2013).  
85 However, a key knowledge gap remains: the role of LST dynamics prior to GLOFs has  
86 not yet been systematically evaluated, despite LST being a potentially useful indicator  
87 of regional climate forcing, lake-surface thermal conditions, and open-water exposure  
88 (Austin and Colman, 2007; Zhang et al., 2014; Debnath et al., 2018; Attiah et al., 2023).

89 In this paper, we investigate whether fluctuations in lake surface temperature can  
90 provide diagnostic information about the timing and magnitude of GLOFs at Lake  
91 Merzbacher. Using MODIS-derived daily LST, we aim to:

- 92 (1) Characterize LST evolution in the days to weeks preceding GLOFs;
- 93 (2) Quantify LST change rates and accelerations as potential early-warning  
94 indicators;
- 95 (3) Evaluate the statistical association between short-term cumulative LST and peak  
96 flood discharge.

97 These analyses provide new insights into LST-based diagnostic indicators of ice-  
98 dammed lake outbursts and contribute to the development of multi-parameter  
99 monitoring tools for GLOF hazard assessment in remote alpine environments.

## 100 **2. Study area**

101 Lake Merzbacher is situated in the remote Inylchek region in the central Tianshan  
102 mountain range in Kyrgyzstan, bordering China, at the confluence of the Northern and

103 Southern Inylchek Glaciers at an altitude of about 3100 m, as illustrated in Figure 1. As  
104 described below, Northern Inylchek Glacier terminates in a proglacial lake, and down  
105 valley lies an ice-dammed lake (impounded by Southern Inylchek Glacier) that has  
106 repeatedly outburst to deliver glacier outburst floods (Häusler et al., 2016). Northern  
107 Inylchek Glacier and its neighbour Southern Inylchek Glacier comprise the largest  
108 compound glacier system in the central Tianshan Mountains. Although located in  
109 Kyrgyzstan, both glaciers drain into the Inylchek River. It feeds the Sary-Dshaz River  
110 in Kyrgyzstan, whose runoff flows into the Kumarik River of the main tributary of the  
111 Aksu River in China to feed that country's largest inland river, the Tarim, which  
112 provides a vital water supply to oases around the Taklamakan Desert (Mayr et al., 2014)  
113 (Fig. 1a). Glacial meltwater contributes at least 35% of the Tarim's total runoff (Aizen  
114 and Aizen, 1998). This proportion is predicted to rise over the next few decades (Aizen  
115 et al., 2007).

116 Lake Merzbacher is not a moraine-dammed lake but a repeatedly draining ice-  
117 dammed lake controlled by the interaction between lake filling and the Southern  
118 Inylchek ice dam (Glazirin, 2010). The lake typically fills during the warm season when  
119 glacier meltwater supply increases, and drainage occurs through englacial or subglacial  
120 pathways once the lake–ice-dam system reaches a critical hydromechanical state (Mayr  
121 et al., 2014). Previous studies have shown that the outburst process is closely related to  
122 changes in lake area, floating-ice coverage, ice-dam displacement, and the evolution of  
123 subglacial drainage (Ng et al., 2007; Mayr et al., 2014; Shangguan et al., 2017). In  
124 particular, high lake levels may promote partial flotation or uplift of the ice dam,  
125 allowing water to penetrate beneath or through the dam and initiate rapid drainage  
126 (Bolch, 2007). These characteristics make Lake Merzbacher an ideal site for testing  
127 whether remotely sensed LST can provide additional diagnostic information on the  
128 thermal preconditioning of GLOFs. In this study, LST is therefore interpreted in relation  
129 to seasonal meltwater supply, lake filling, open-water exposure, and possible thermal  
130 effects on drainage-channel enlargement, rather than as an independent trigger of ice-  
131 dam failure.

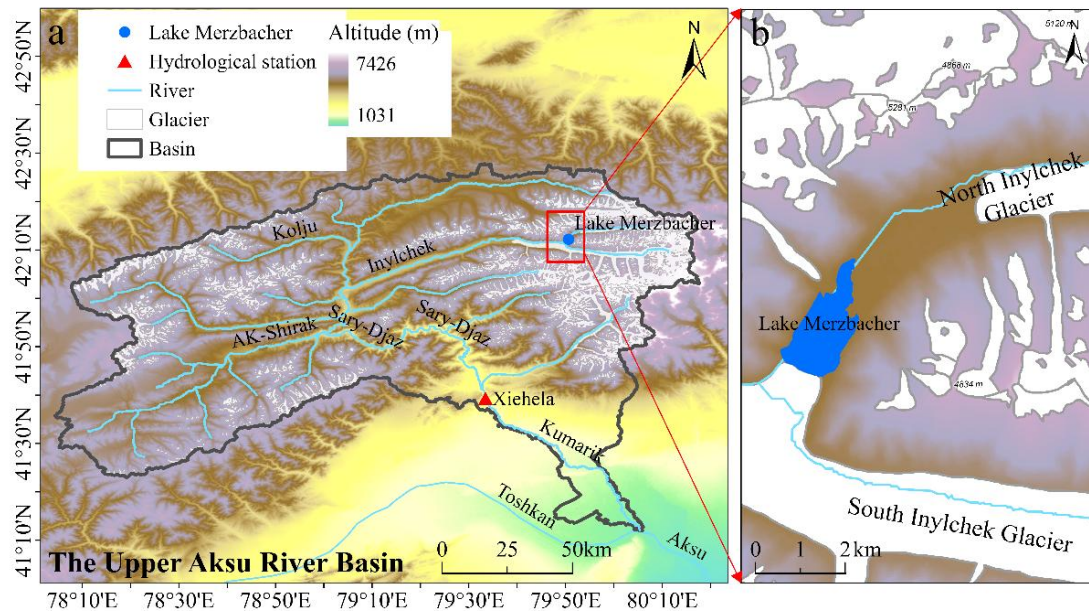

132

133 **Figure 1.** Location and glacio-hydrological setting of Lake Merzbacher in the central  
 134 Tianshan Mountains. (a) Topography, glacier distribution, river network, basin  
 135 boundary, Lake Merzbacher, and the Xiehela hydrological station in the Upper Aksu  
 136 River Basin. (b) Enlarged map of Lake Merzbacher and the adjacent North Inylchek  
 137 and South Inylchek glaciers. Land, glaciers, and water bodies are distinguished by  
 138 different colours and are indicated in the legend.

139 **3. Data and Methods**

140 **3.1 Glacial Lake Area and GLOF Records**

141 The area of glacial lakes is a key predictor of susceptibility and hazard (Allen et al.,  
 142 2019). For Lake Merzbacher, historical lake area from 1990 to 2015 and documented  
 143 outburst dates from 2000 to 2015 were obtained from published sources (Liu, 1993;  
 144 Glazirin, 2010; Kingslake and Ng, 2013; Shangguan et al., 2017; Li et al., 2020). Lake  
 145 area and outburst dates from 2016 to 2022 were extracted from high-resolution Planet  
 146 Scope (DOVA) satellite imagery (Table S1, Supplementary Material). Planet's Dove  
 147 satellites are CubeSats that weigh 4 kilograms (1000 times lower than other commercial  
 148 imaging satellites), 10 by 10 by 30 centimetres in length, width and height, orbit at a  
 149 height of about 400 kilometres and provide imagery with a resolution of 3-5 metres and  
 150 are envisaged for environmental, humanitarian, and business applications.

151 For each documented GLOF, the pre-outburst lake area was obtained from the  
 152 available satellite imagery. A total of 25 GLOF events from 2000 to 2022 were included  
 153 in this study. Since 2000, no GLOF events triggered by glacier surges were reported in  
 154 Lake Merzbacher (Liu et al., 2023).

### 155 3.2 Lake Surface Temperature Data

156 Lake surface temperature (LST) was derived from the MODIS Terra Land Surface  
157 Temperature Daily L3 Global 1 km product (MOD11A1). In this study, LST was  
158 derived from the daytime MODIS LST product; therefore, the values represent daytime  
159 radiometric lake surface skin temperature rather than daily mean bulk water  
160 temperature. MODIS LST has been shown to accurately reflect in situ lake temperature  
161 measurements at Lake Merzbacher, with  $R^2 = 0.79$  for 2009–2010 observations  
162 (Bormudoi et al., 2012).

163 To address missing data, gap-filling was performed using the Climate Forecast  
164 System Version 2 (CFSv2)–MODIS integration in Google Earth Engine, generating  
165 continuous 1 km LST time series (Shiff et al., 2021). The filled dataset (CFSv2\_LST)  
166 was evaluated against the original MODIS LST using mean absolute error (MAE), bias,  
167 and  $R^2$ , yielding high consistency ( $R^2 = 0.95$ , MAE = 1.31°C; Figure S1).

### 168 3.3 LST Temporal Analysis

169 In meteorology, a moving average is commonly used with time series data to smooth  
170 out short-term fluctuations and highlight longer-term trends for mean daily air  
171 temperatures (Hewitson and Crane, 1996). For the filled daily lake surface temperature  
172 (LST) series, the five-day moving average was used to produce smooth LST curves.  
173 Xie et al. (2013) divided Lake Merzbacher into four periods according to the outburst  
174 index: icefall, quick water storage, early-warning and post-drainage. During these four  
175 periods, the lake is filled with water and the water movement is slow; it takes about  
176 one month for an outburst to occur and about a week for the lake to empty after the  
177 drainage (Xie et al., 2013). Therefore, in this paper, the first and second derivative of  
178 the daily LST were calculated for one month before and one week after the glacial lake  
179 outburst.

180 The 25 documented GLOF events were aligned according to their outburst dates,  
181 with day 0 representing the GLOF date, negative values indicating days before the  
182 outburst, and positive values indicating days after the outburst. For each event, the first  
183 and second derivatives of the smoothed daily LST series were calculated over the  
184 window from 30 days before to 7 days after the outburst. The first derivative,  $dLST/dt$ ,  
185 was used to describe the rate of LST change, with units of  $^{\circ}\text{C}\cdot\text{d}^{-1}$ . The second derivative,  
186  $d^2LST/dt^2$ , was used to describe the acceleration of LST change, with units of  $^{\circ}\text{C}\cdot\text{d}^{-2}$ .

187 To identify significantly accelerated warming, all event-aligned  $d^2LST/dt^2$  values  
188 from the 25 GLOF event windows were pooled. The mean  $\mu$  and standard deviation  $\sigma$

189 of these  $d^2\text{LST}/dt^2$  values were then calculated, where  $\mu$  denotes the mean LST  
190 acceleration and  $\sigma$  denotes its standard deviation. The acceleration threshold was  
191 defined as  $\mu + 1.5\sigma$ . Values of  $d^2\text{LST}/dt^2$  exceeding this threshold were classified as  
192 significantly accelerated warming periods. For each GLOF event, the frequency of such  
193 accelerated warming periods was then counted within the 30 days before outburst.

194 To characterize short-term surface thermal accumulation before each outburst, we  
195 calculated a positive cumulative LST index over different pre-outburst windows. This  
196 index was defined as the sum of positive daily MODIS-derived LST values before the  
197 GLOF event and was used as an empirical indicator of surface thermal conditions and  
198 open-water exposure. It should not be interpreted as a direct estimate of lake-water heat  
199 content, subaqueous melt, or ice-dam ablation, because MODIS LST represents only  
200 the radiometric surface skin temperature of the lake (Austin and Colman, 2007; Zhang  
201 et al., 2014). The surface temperature may differ from the temperature at depth, at the  
202 lake bottom, or at the ice–water interface, especially under vertical thermal stratification  
203 (Attiah et al., 2023) (Figure. 2).

204 The positive cumulative LST index was calculated as:

$$205 \quad T_A^{(N)} = \sum_{k=1}^N \max(T_k, 0)$$

206 where  $T_A^{(N)}$  denotes the cumulative positive LST during the N days before the  
207 outburst,  $T_k$  is the corrected daily mean MODIS-derived LST on day k before the  
208 outburst, and N is the length of the accumulation window. Only positive LST values  
209 were accumulated; days with  $\text{LST} \leq 0$  °C were assigned a value of zero in the  
210 cumulative index. It should be noted that MODIS-derived LST does not directly  
211 represent the thermal conditions at depth or at the ice–water interface. For water  
212 temperatures below approximately 4 °C, density-driven stratification may allow near-  
213 surface water to remain close to 0 °C while deeper water is warmer (Cogley et al., 2011).  
214 Conversely, a positive surface temperature does not necessarily imply that the entire  
215 lake column is warm or that substantial subaqueous melt is occurring at the ice dam.  
216 Therefore, the cumulative LST index used here should be interpreted as a surface  
217 thermal precursor and an indicator of open-water thermal conditions, rather than as a  
218 direct measure of melt energy or ice-dam ablation (Liu et al., 2014). Direct lake-  
219 temperature profiles, lake-level observations, and ice-dam measurements would be  
220 required to quantify the relationship between surface thermal conditions and melt or  
221 drainage processes at depth.

222 In this study, to characterize trends in regional terrestrial air temperature, 2 m air  
 223 temperatures (T) were obtained from the European Centre for Medium-Range Weather  
 224 Forecasts (ECMWF) for the land component of the fifth-generation European  
 225 Reanalysis dataset (ERA5-Land) for the period 2000–2022 (Muñoz-Sabater et al.,  
 226 2021). Reanalysis data provide a consistent and globally complete description of past  
 227 climate, allowing evaluation of regional warming trends relevant to LST dynamics and  
 228 GLOF occurrence.

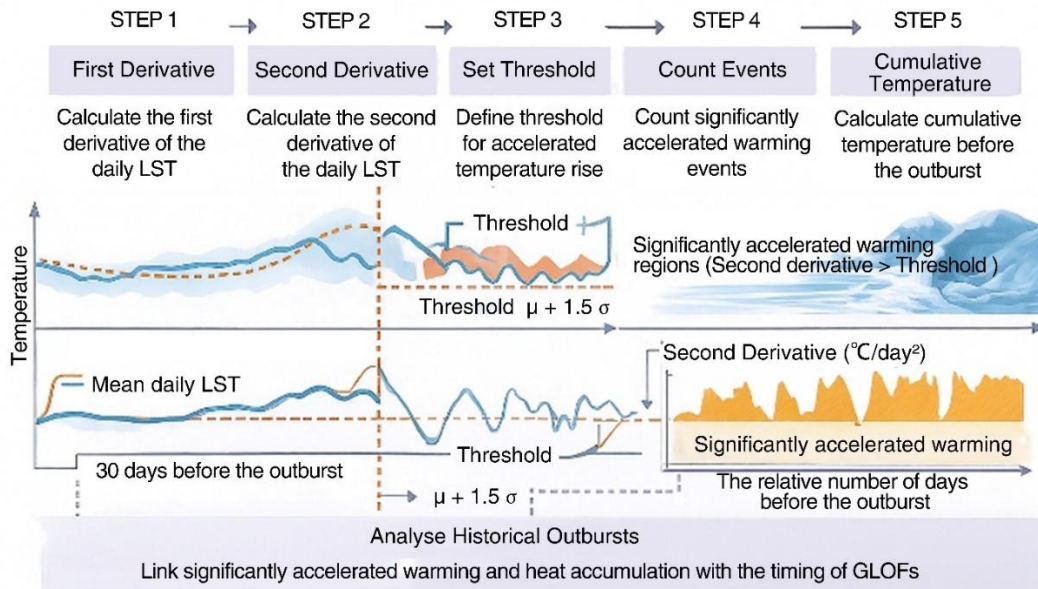

229  
 230 **Figure 2.** Schematic workflow for detecting thermal precursor signals before glacial  
 231 lake outburst floods (GLOFs). The five steps shown at the top indicate the data-  
 232 processing workflow. Daily MODIS-derived LST is first smoothed and differentiated  
 233 to calculate the rate of LST change and its acceleration. The x-axis in the time-series  
 234 panels represents days relative to the outburst date, with negative values indicating days  
 235 before the GLOF. The blue line denotes the mean or smoothed daily LST, the light-blue  
 236 shading indicates the variability among historical events, the orange dashed vertical line  
 237 marks the outburst date, and the orange shaded areas indicate significantly accelerated  
 238 warming periods where the second derivative exceeds the threshold  $\mu + 1.5\sigma$ . These  
 239 thermal indicators are then combined with cumulative LST before the outburst to  
 240 evaluate their relationship with GLOF timing and magnitude.

## 241 4. Results

### 242 4.1 Temporal trends of LST, lake area, and GLOF timing

243 Temperature-anomaly analysis shows that MODIS-derived LST exhibited a stronger  
 244 warming tendency than ERA5-Land 2 m air temperature during the core melt season,  
 245 especially in July and August (Fig. 3). The July LST anomaly showed the largest  
 246 positive trend, whereas trends in monthly T2m anomalies were weaker. Because

247 MODIS-derived LST represents daytime radiometric lake surface skin temperature and  
248 ERA5-Land T2m represents near-surface air temperature, these two variables should  
249 be compared in terms of anomalies and trends rather than absolute values.

250 Satellite image analysis from 1990 to 2022 revealed a declining trend in the  
251 maximum observed lake area (Fig. S2a). The average lake area over this period was  
252 3.22 km<sup>2</sup>, with a maximum of 3.95 km<sup>2</sup> on 9 August 1996 and a minimum of 2.12 km<sup>2</sup>  
253 on 4 July 2021. Because direct lake-volume observations are not available for all events,  
254 lake area is used here only as a first-order geometric proxy for lake storage. The timing  
255 of GLOFs advanced by approximately 0.6 days yr<sup>-1</sup> (Fig. S2b), with most post-2000  
256 events occurring from early July to mid-August. This earlier occurrence may be  
257 associated with changes in meltwater supply, lake filling rate, ice-dam geometry, and  
258 the evolving efficiency of englacial or subglacial drainage pathways.

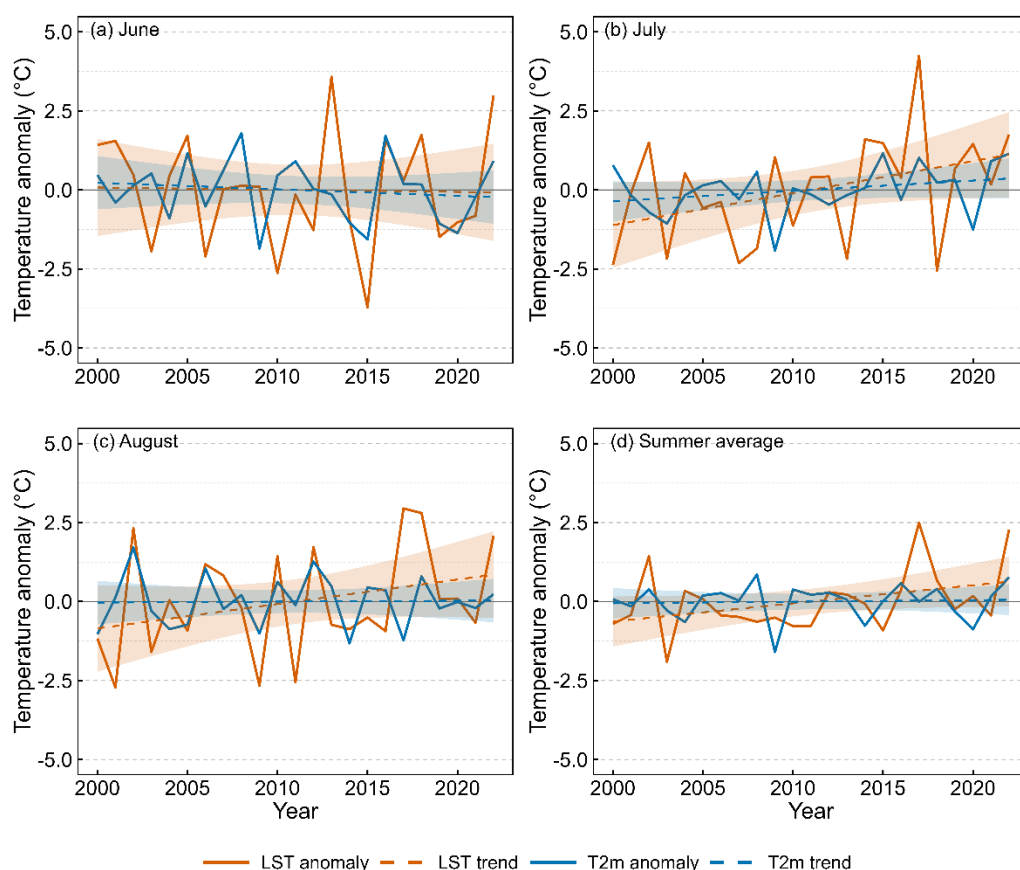

259

260 **Figure 3.** Interannual variations in monthly and summer temperature anomalies of  
261 MODIS-derived lake surface temperature (LST) and ERA5-Land 2 m air temperature  
262 (T2m) from 2000 to 2022. Temperature anomalies were calculated relative to the 2000–  
263 2022 mean for each month or season. Panels show June (a), July (b), August (c), and  
264 the June–August summer mean (d). Monthly values were calculated as the arithmetic

265 mean of all valid daily values within the corresponding month, and the summer mean  
266 was calculated as the average of June, July, and August monthly anomalies. Solid lines  
267 show annual anomalies, dashed lines show linear trends, and shaded areas indicate the  
268 95 % confidence intervals of the trends.

#### 269 4.2 Short-Term LST Dynamics Before the Glacial Lake Outburst

270 Analysis of LST in the 30-day window preceding each GLOF event reveals  
271 characteristic warming patterns. GLOFs predominantly occurred on days when LST  
272 exceeded 12 °C, with approximately 90 % of events falling within the 12–20 °C range  
273 (Fig. 4). The lake may remain stable at LST values above 12 °C if lake level, hydrostatic  
274 pressure, ice-dam flotation conditions, and englacial or subglacial drainage  
275 connectivity have not yet reached a critical state. For Lake Merzbacher, outburst  
276 initiation is more appropriately interpreted as the activation, connection, or enlargement  
277 of englacial and subglacial drainage pathways, probably associated with lake filling,  
278 increasing hydrostatic pressure, and partial ice-dam flotation (Kingslake and Ng, 2013).  
279 A few events occurred under very high LST conditions, exceeding 20 °C, for example  
280 25.4 °C on 8 July 2017 and 23.5 °C on 10 August 2018, which may indicate periods of  
281 enhanced surface heating, meltwater input, and favorable conditions for drainage-  
282 system development (Chikita et al., 2000; Ogier et al., 2021). Therefore, the 12 °C level  
283 is used here as a non-deterministic thermal indicator of elevated outburst likelihood and  
284 should be combined with LST change rate, LST acceleration, lake filling, floating-ice  
285 coverage, water level, and ice-dam motion for early-warning purposes.

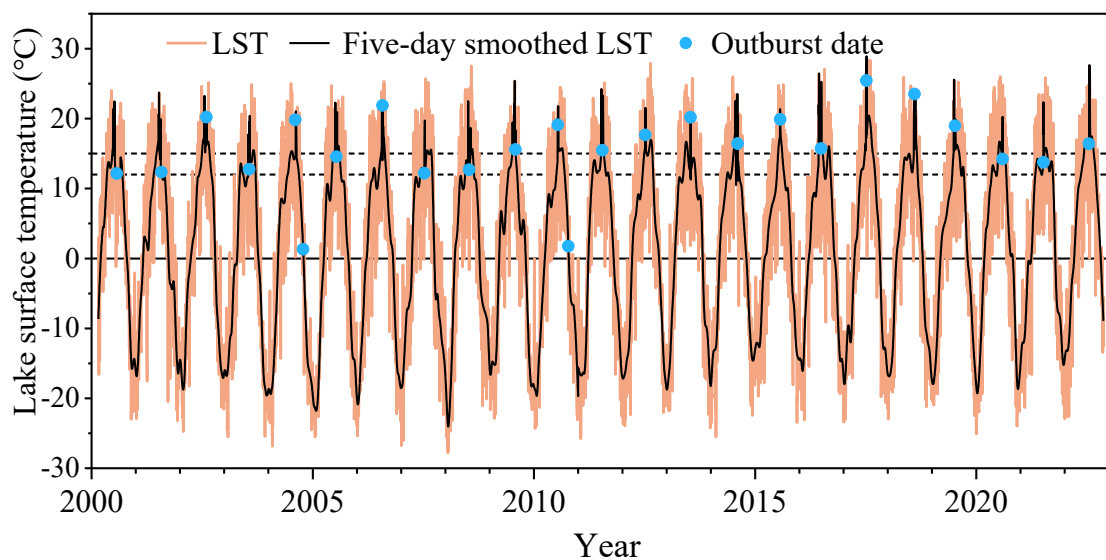

286

287 **Figure 4.** Lake surface temperature fluctuations in Lake Merzbacher from 2000 to 2022.

288 Blue dot represents the outburst date of the glacial lake.

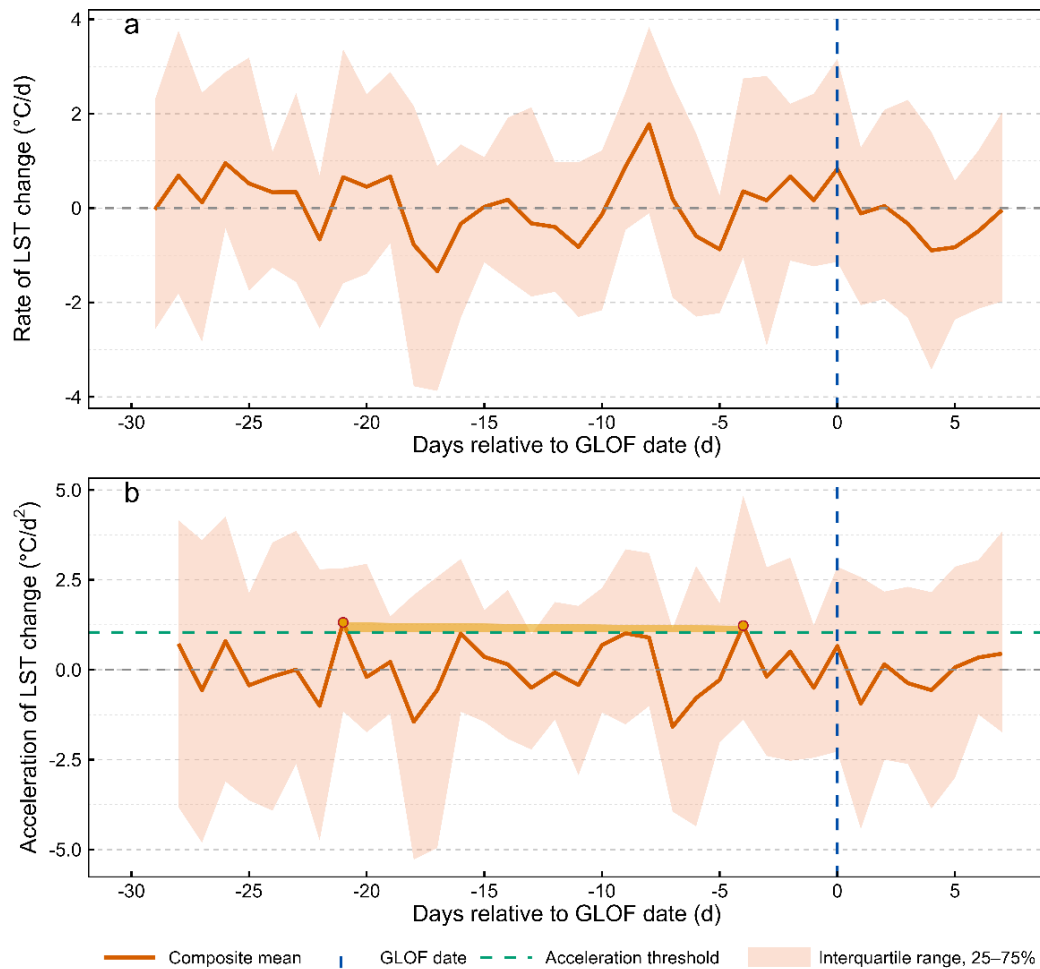

289

290 **Figure 5.** Composite short-term LST dynamics before and after GLOF events at Lake  
 291 Merzbacher. The curves were calculated by aligning the 25 documented GLOF events  
 292 to their outburst dates. Day 0 indicates the GLOF date, negative values indicate days  
 293 before the outburst, and positive values indicate days after the outburst. (a) Rate of LST  
 294 change,  $dLST/dt$ , in  $^{\circ}C d^{-1}$ . (b) Acceleration of LST change,  $d^2LST/dt^2$ , in  $^{\circ}C d^{-2}$ . The  
 295 thick orange-red line represents the multi-event composite mean, and the light-orange  
 296 envelope represents the interquartile range, 25–75 %. The vertical blue dashed line  
 297 marks the GLOF date, and the horizontal green dashed line in panel (b) indicates the  
 298 acceleration threshold of  $1.04^{\circ}C d^{-2}$ .

299 Statistical analysis shows a rapid LST increase within approximately eight days  
 300 before outbursts (Fig. 5a). A two-sample t-test confirms the presence of a short-term  
 301 warming signal prior to GLOFs ( $p < 0.05$ ). On the outburst day, the rate of LST change  
 302 peaks at  $0.65^{\circ}C \cdot day^{-1}$ .

303 To quantify thermal acceleration, the second derivative of LST was computed over a  
 304 30-day window centered on each outburst. Based on 25 historical events (Table S1), an

305 empirical acceleration threshold of  $1.04\text{ }^{\circ}\text{C d}^{-2}$  was identified for detecting unusually  
 306 rapid LST increases in the event-aligned composite series. Two exceedances were  
 307 observed: 22 days before the outburst ( $1.20\text{ }^{\circ}\text{C}\cdot\text{day}^{-2}$ ) and 9 days before the outburst  
 308 ( $1.16\text{ }^{\circ}\text{C}\cdot\text{day}^{-2}$ ). The earlier signal may indicate the onset of accelerated thermal activity,  
 309 while the latter corresponds to a pre-outburst thermal reinforcement phase, potentially  
 310 defining a short-term diagnostic window for enhanced monitoring. Post-outburst, LST  
 311 change rates decline rapidly and occasionally turn negative, reflecting system re-  
 312 equilibration and meltwater inflow (Fig. 5b).

### 313 4.3 Short-Term Cumulative Temperature and Peak Discharge

314 Before interpreting the relationship between cumulative LST and peak discharge, it is  
 315 important to note that flood magnitude is expected to be controlled at first order by the  
 316 amount of water available for drainage. In the absence of direct lake-volume  
 317 measurements for all events, the observed lake area provides only a first-order  
 318 geometric proxy for lake storage. Therefore, cumulative LST is interpreted here as a  
 319 supplementary surface thermal indicator that may modulate drainage efficiency, rather  
 320 than as a replacement for lake-volume or lake-level controls.

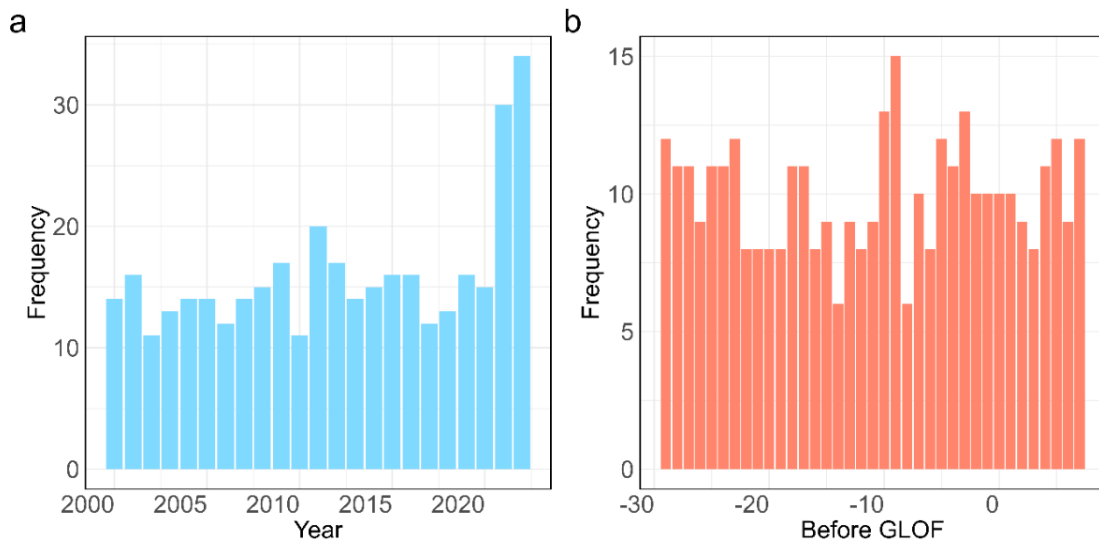

321  
 322 **Figure 6.** Frequency and timing of accelerated LST warming occurrences. An  
 323 accelerated LST warming occurrence is defined as a daily value of  $d^2\text{LST}/dt^2$  exceeding  
 324 the empirical acceleration threshold of  $1.04\text{ }^{\circ}\text{C d}^{-2}$  within the event-aligned GLOF  
 325 windows. (a) Annual frequency of accelerated LST warming occurrences from 2000 to  
 326 2022. (b) Distribution of accelerated LST warming occurrences by days relative to the  
 327 GLOF date, where day 0 indicates the outburst date and negative values indicate days  
 328 before outburst.

329 The frequency of accelerated LST warming occurrences increased in recent years,

330 particularly over the past decade, and reached its maximum in 2022 (Fig. 6a). Here, an  
 331 accelerated LST warming occurrence is defined as a daily value within the event-  
 332 aligned GLOF windows for which the LST acceleration,  $d^2LST/dt^2$ , exceeds the  
 333 empirical threshold of  $1.04\text{ }^\circ\text{C}\cdot\text{d}^{-2}$ . Therefore, these occurrences represent threshold-  
 334 exceeding LST acceleration days, rather than independent GLOF events. From 2000 to  
 335 the mid-2010s, such occurrences were relatively evenly distributed. Their timing  
 336 relative to outburst dates shows a clear clustering approximately 10 days before GLOFs  
 337 (Fig. 6b), suggesting that abrupt LST acceleration may provide a short-term diagnostic  
 338 signal during the pre-outburst phase. Although threshold-exceeding acceleration occurs  
 339 throughout the 30-day pre-outburst window, the localized peak indicates a period  
 340 during which enhanced monitoring may be particularly useful.

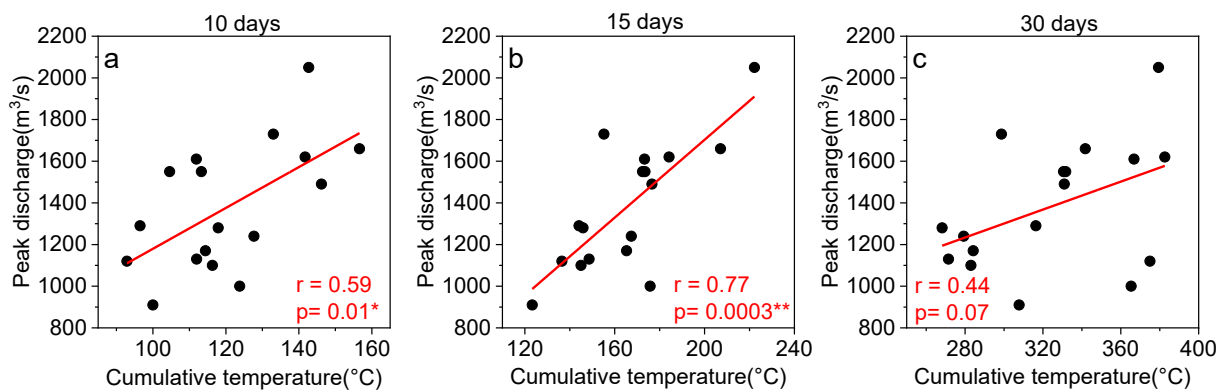

341  
 342 **Figure 7.** Relationships between short-term cumulative temperature and GLOF peak  
 343 discharge. Correlation coefficients ( $r$ ) and significance levels ( $p$ ) are indicated for 10-,  
 344 15-, and 30-day accumulation windows.

345 To investigate whether short-term surface thermal conditions are associated with  
 346 flood magnitude, we analyzed the relationships between GLOF peak discharge and  
 347 cumulative LST over 10-day, 15-day, and 30-day windows before each outburst event  
 348 (Fig. 7). Peak discharge is expected to be controlled at first order by the amount of  
 349 water available for drainage, lake level, hydraulic head, drainage-pathway geometry,  
 350 and the rate of enlargement of englacial or subglacial channels. Because direct lake-  
 351 volume observations were not available for all events, lake area was used only as a first-  
 352 order geometric proxy for lake storage. Cumulative LST should therefore be interpreted  
 353 as a supplementary surface thermal index that may reflect conditions favorable for  
 354 meltwater input, lake filling, and thermally enhanced drainage-channel enlargement.

355 A positive relationship was observed between cumulative LST and peak discharge  
 356 for the shorter accumulation periods. For the 10-day accumulation window, higher

357 cumulative LST was associated with larger peak discharge ( $r = 0.59$ ,  $p = 0.01$ ). The  
358 relationship was strongest for the 15-day window ( $r = 0.77$ ,  $p = 0.0003$ ), suggesting that  
359 the 15-day cumulative LST index provides the strongest statistical association with  
360 peak discharge among the tested accumulation windows. In contrast, the 30-day  
361 cumulative LST showed a weaker and statistically insignificant relationship with peak  
362 discharge ( $r = 0.44$ ,  $p = 0.07$ ), indicating that longer accumulation windows may dilute  
363 the short-term surface thermal signal associated with the pre-outburst drainage state.  
364 Overall, these results suggest that cumulative LST is statistically associated with GLOF  
365 peak discharge, but the physical interpretation must be considered together with lake  
366 storage, lake level, ice-dam geometry, and englacial or subglacial drainage development.

## 367 **5. Discussion**

### 368 5.1 Mechanistic links and limits of LST as a GLOF precursor

369 This study identifies statistically consistent LST signals before GLOFs at Lake  
370 Merzbacher, including an empirical 12 °C LST reference level, a rapid warming phase  
371 several days before outburst, and a statistical association between 10–15-day  
372 cumulative LST and peak discharge. Therefore, the observed pre-outburst increase and  
373 acceleration in LST should be interpreted as remotely sensed precursor signals,  
374 indicating that the lake–ice-dam system is approaching a high-risk pre-drainage state.  
375 These signals likely reflect the combined effects of enhanced glacier meltwater supply,  
376 rapid lake filling, increased hydrostatic pressure, partial ice-dam flotation, and the  
377 connection or enlargement of englacial and subglacial drainage pathways (Ogier et al.,  
378 2021). As the lake level rises, water pressure at the ice-dam interface may approach the  
379 ice overburden pressure, promoting partial flotation or uplift of the ice dam and  
380 allowing water to penetrate beneath or through the dam (Mayr et al., 2014). In this  
381 hydrostatic-pressure-induced flotation and drainage-initiation mechanism, lake level,  
382 lake volume, ice-dam thickness, dam geometry, drainage-pathway connectivity, and  
383 heat transfer to conduit walls are the primary controls on drainage initiation (Ng et al.,  
384 2007; Ogier et al., 2021).

385 Within this framework, LST is more appropriately regarded as a process-related  
386 precursor rather than a standalone causal trigger. Elevated LST may reflect enhanced  
387 summer energy input, reduced floating-ice cover, increased open-water exposure, and  
388 intensified glacier meltwater supply to the lake. These conditions favor rapid lake filling  
389 and may bring the lake closer to the hydrostatic conditions required for flotation-  
390 induced drainage (Kingslake and Ng, 2013). Therefore, the observed pre-outburst LST

391 increase is likely linked to the preconditioning phase of GLOFs through its association  
392 with meltwater production, lake storage, and the seasonal evolution of the lake–ice-  
393 dam system (Emmer et al., 2022).

394 LST may also influence the drainage–evolution phase after drainage has initiated .  
395 Relatively warm lake water can enhance thermal erosion along englacial or subglacial  
396 conduits, thereby accelerating conduit enlargement and affecting the rising limb and  
397 magnitude of the outburst hydrograph (Austin and Colman, 2007). This interpretation  
398 is consistent with the observed positive correlation between short-term cumulative LST  
399 and peak discharge. Nevertheless, the present dataset does not allow us to distinguish  
400 whether thermal erosion initiates drainage or mainly amplifies discharge after a  
401 hydrostatic-pressure threshold has been reached. Direct observations of lake level, lake-  
402 water temperature profiles, ice-dam thickness, ice-dam displacement, and subglacial  
403 drainage evolution would be required to resolve this distinction.

## 404 5.2 Implications for early-warning system design

405 The LST indicators proposed in this study are most useful when incorporated into a  
406 multi-parameter early-warning framework rather than used as independent predictors.  
407 The 12 °C LST reference level may be used as a first-level empirical indicator of the  
408 warm-season window during which outbursts are more likely, but it should not be  
409 interpreted as a deterministic trigger threshold. Rapid LST increase and positive LST  
410 acceleration may provide short-term diagnostic information on the approach of a pre-  
411 drainage state. However, because Lake Merzbacher outbursts are likely controlled by  
412 hydrostatic pressure and ice-dam flotation, LST should be combined with variables that  
413 directly describe lake filling and dam response (Jenson et al., 2022).

414 A practical early-warning framework should therefore integrate: (1) absolute LST  
415 and LST anomalies, indicating lake thermal state; (2)  $dLST/dt$  and  $d^2LST/dt^2$ , indicating  
416 rapid pre-outburst thermal change; (3) lake area and floating-ice coverage, indicating  
417 water storage and lake-surface evolution; (4) lake level or water-volume estimates,  
418 indicating hydrostatic pressure against the ice dam; (5) ice-dam displacement or surface  
419 velocity from GNSS, InSAR, or optical feature tracking, indicating possible flotation  
420 or mechanical adjustment of the dam; and (6) downstream discharge, seismic, or  
421 acoustic signals, indicating the onset of drainage. In such a framework, LST contributes  
422 valuable remotely sensed information, especially in remote alpine environments where  
423 in situ observations are limited, but it should be interpreted together with hydrological  
424 and glaciological indicators.

### 425 5.3 Non-stationarity of the LST indicator and future system evolution

426 The 12 °C LST reference level identified in this study is empirical, site-specific, and  
427 period-specific. The Lake Merzbacher system is non-static: glacier thinning, ice-dam  
428 lowering, changes in lake-basin geometry, variations in maximum lake volume, and  
429 evolving subglacial drainage efficiency may all modify the lake level required for  
430 flotation-induced drainage (Shangguan et al., 2017). As a result, the LST value  
431 associated with outburst occurrence may change over time even if the underlying  
432 hydrostatic mechanism remains similar.

433 The observed decline in maximum lake area and the advance in GLOF timing suggest  
434 that the lake–ice-dam system is already evolving (Li et al., 2020). Under continued  
435 climate warming, earlier snow and ice melt may shorten the lake-filling period and shift  
436 outbursts to earlier in summer (Veh et al., 2025). At the same time, glacier thinning and  
437 changes in dam geometry may reduce the storage volume required to initiate drainage  
438 or alter the hydraulic efficiency of subglacial conduits (Häusler et al., 2016). These  
439 changes could affect both the timing and magnitude of future GLOFs. Therefore, the  
440 LST threshold and acceleration criteria proposed here should be recalibrated regularly  
441 as new outburst events and updated satellite observations become available.

442 Overall, our results indicate that LST provides a useful remotely sensed precursor  
443 for Lake Merzbacher GLOFs, but its physical interpretation must be embedded within  
444 the broader lake-filling, ice-dam flotation, and subglacial drainage framework. Future  
445 work should combine thermal remote sensing with lake-level reconstruction, floating-  
446 ice monitoring, ice-dam displacement measurements, and coupled thermal–  
447 hydrological–mechanical modelling to better separate the roles of hydrostatic pressure  
448 and thermal erosion in the outburst process.

## 449 **6. Conclusions**

450 This study demonstrates that MODIS-derived lake surface temperature (LST) provides  
451 useful remotely sensed diagnostic information associated with the timing and  
452 magnitude of GLOFs at Lake Merzbacher. The main findings are as follows.

453 First, summer LST showed a warming trend of 0.06 °C yr<sup>-1</sup> during 2000–2022,  
454 indicating that the lake surface is sensitive to warm-season thermal conditions. Second,  
455 approximately 90 % of documented GLOFs occurred when LST exceeded 12 °C. This  
456 value should be interpreted as an empirical, site-specific LST reference level marking  
457 the warm-season window of elevated outburst likelihood, rather than as a deterministic  
458 trigger threshold. Third, event-aligned analysis revealed short-term LST signals before

459 outburst, including a rapid warming phase of up to  $0.65\text{ }^{\circ}\text{C}\cdot\text{d}^{-1}$  and an empirical  
460 acceleration signal exceeding  $1.04\text{ }^{\circ}\text{C}\cdot\text{d}^{-2}$  around 9 days before drainage. Fourth, 10–  
461 15-day cumulative LST was statistically associated with peak discharge, with the  
462 strongest correlation found for the 15-day accumulation window.

463 These results suggest that LST can serve as a supplementary precursor within a multi-  
464 parameter early-warning framework. However, LST should not be interpreted as a  
465 standalone trigger or primary control of Lake Merzbacher outbursts. Drainage initiation  
466 is more likely governed by lake filling, lake level, hydrostatic pressure, ice-dam  
467 geometry, partial flotation, and the activation or enlargement of englacial and subglacial  
468 drainage pathways. Therefore, future monitoring should combine LST, LST change rate,  
469 LST acceleration, lake area, lake level or volume estimates, floating-ice coverage, ice-  
470 dam displacement, and downstream hydrological or seismic observations. The  
471 empirical LST reference level and acceleration criteria proposed here should be  
472 recalibrated as new GLOF events and updated satellite observations become available.

473

#### 474 **Data availability**

475 The MODIS MOD11A1 LST product used in this study is available from the NASA  
476 Land Processes Distributed Active Archive Center (LP DAAC) at  
477 <https://lpdaac.usgs.gov/data>. ERA5-Land data are available from the European Centre  
478 for Medium-Range Weather Forecasts (ECMWF) at [https://www.ecmwf.int/en/era5-](https://www.ecmwf.int/en/era5-land)  
479 [land](https://www.ecmwf.int/en/era5-land). Meteorological data are available from the China Meteorological Data Service  
480 Centre at <http://data.cma.cn/en>. Basic geographic data, including rivers, glaciers, and  
481 DEM data, were obtained from the National Tibetan Plateau Data Centre at  
482 <https://data.tpdc.ac.cn>. The processed data used in this study are available from the  
483 corresponding author upon reasonable request.

484

#### 485 **Financial support**

486 This work was financially supported by the Key Research and Development Project of  
487 the Ministry of Science and Technology (grant no. 2025YFE0211400), the  
488 International Partnership of the Chinese Academy of Sciences (grant no.  
489 046GJHZ2023069MI), the National Natural Science Foundation of China (grant nos.  
490 42371145 and 42001068), the Gansu Province Postdoctoral Funding Project at the  
491 Northwest Institute of Eco-Environment and Resources (grant no. E539880320), the  
492 Gansu Provincial Natural Science Foundation (grant no. 25JRRA502), the Scientific

493 Research Project of Shule River Basin Water Resources Utilization Center, Gansu  
494 Province (grant no. SLH/KYXM-2025-01), and the Gansu Province Water Science  
495 Experimental Research and Technology Promotion Project (grant no. 25GSLK077).

496

#### 497 **Author contributions**

498 Donghui Shangguan initiated the idea. Meixia Wang, Donghui Shangguan, and Da Li  
499 conceived the study. Meixia Wang and Da Li collected and processed the data. Meixia  
500 Wang performed the analysis, drafted the original manuscript, and designed the figures.  
501 Donghui Shangguan, Da Li, Yaojun Li, Rongjun Wang, and Jinkui Wu discussed the  
502 results. Asim Qayyum Butt polished the manuscript. All authors reviewed the  
503 manuscript and approved the final version.

504

#### 505 **Competing interests**

506 The authors declare that they have no conflict of interest.

507

#### 508 **Copyright statement**

509 The copyright statement will be included by Copernicus, if applicable.

510

#### 511 **References**

512 Aizen, V. B. and Aizen, E. M.: Estimation of glacial runoff to the Tarim River, central  
513 Tien Shan, IAHS Publ., 248, 191–198, 1998.

514 Aizen, V. B., Aizen, E. M., and Kuzmichonok, V. A.: Glaciers and hydrological changes  
515 in the Tien Shan: simulation and prediction, *Environ. Res. Lett.*, 2, 045019,  
516 <https://doi.org/10.1088/1748-9326/2/4/045019>, 2007.

517 Allen, S. K., Zhang, G., Wang, W., Yao, T., and Bolch, T.: Potentially dangerous glacial  
518 lakes across the Tibetan Plateau revealed using a large-scale automated assessment  
519 approach, *Sci. Bull.*, 64, 435–445, <https://doi.org/10.1016/j.scib.2019.03.011>, 2019.

520 Attiah, G., Kheyrollah Pour, H., and Scott, K. A.: Lake surface temperature retrieved  
521 from Landsat satellite series (1984 to 2021) for the North Slave Region, *Earth Syst.*  
522 *Sci. Data*, 15, 1329–1355, <https://doi.org/10.5194/essd-15-1329-2023>, 2023.

523 Austin, J. A. and Colman, S. M.: Lake Superior summer water temperatures are  
524 increasing more rapidly than regional air temperatures: A positive ice-albedo  
525 feedback, *Geophys. Res. Lett.*, 34, L06604, <https://doi.org/10.1029/2006GL029021>,  
526 2007.

527 Bolch, T.: Climate change and glacier retreat in northern Tien Shan  
528 (Kazakhstan/Kyrgyzstan) using remote sensing data, *Global Planet. Change*, 56, 1–  
529 12, <https://doi.org/10.1016/j.gloplacha.2006.07.009>, 2007.

530 Bormudoi, A., Shabunin, A., Hazarika, M. K., Zaginaev, V., and Samarakoon, L.:  
531 Studying the outburst of the Merzbacher lake of Inylchek Glacier, Kyrgyzstan with  
532 remote sensing and field data, in: *Proceedings of the 33rd Asian Conference on*  
533 *Remote Sensing*, Pattaya, Thailand, 2012.

534 Carrivick, J. L. and Tweed, F. S.: A global assessment of the societal impacts of glacier  
535 outburst floods, *Global Planet. Change*, 144, 1–16,  
536 <https://doi.org/10.1016/j.gloplacha.2016.07.001>, 2016.

537 Chen, Y., Li, W., Deng, H., Fang, G., and Li, Z.: Changes in Central Asia’s Water Tower:  
538 Past, Present and Future, *Sci. Rep.*, 6, 39364, <https://doi.org/10.1038/srep39364>,  
539 2016.

540 Chikita, K., Joshi, S. P., Jha, J., and Hasegawa, H.: Hydrological and thermal regimes  
541 in a supra-glacial lake: Imja, Khumbu, Nepal Himalaya, *Hydrol. Sci. J.*, 45, 507–521,  
542 <https://doi.org/10.1080/02626660009492353>, 2000.

543 Debnath, M., Syiemlieh, H. J., Sharma, M. C., Kumar, R., Chowdhury, A., and Lal, U.:  
544 Glacial lake dynamics and lake surface temperature assessment along the  
545 Kangchengayo-Pauhunri Massif, Sikkim Himalaya, 1988–2014, *Remote Sens. Appl.:*  
546 *Soc. Environ.*, 9, 26–41, <https://doi.org/10.1016/j.rsase.2017.11.002>, 2018.

547 Emmer, A., Allen, S. K., Carey, M., Frey, H., Huggel, C., Korup, O., Mergili, M., Sattar,  
548 A., Veh, G., Chen, T. Y., Cook, S. J., Correas-Gonzalez, M., Das, S., Diaz Moreno,  
549 A., Drenkhan, F., Fischer, M., Immerzeel, W. W., Izagirre, E., Joshi, R. C.,  
550 Kougkoulos, I., Kuyakanon Knapp, R., Li, D., Majeed, U., Matti, S., Moulton, H.,  
551 Nick, F., Piroton, V., Rashid, I., Reza, M., Ribeiro De Figueiredo, A., Riveros, C.,  
552 Shrestha, F., Shrestha, M., Steiner, J., Walker-Crawford, N., Wood, J. L., and Yde, J.  
553 C.: Progress and challenges in glacial lake outburst flood research (2017–2021): a  
554 research community perspective, *Nat. Hazards Earth Syst. Sci.*, 22, 3041–3061,  
555 <https://doi.org/10.5194/nhess-22-3041-2022>, 2022.

556 Glazirin, G. E.: A century of investigations on outbursts of the ice-dammed lake  
557 Merzbacher (central Tien Shan), *Austrian J. Earth Sci.*, 103, 171–179, 2010.

558 Gu, C., Li, S., Liu, M., Hu, K., and Wang, P.: Monitoring Glacier Lake Outburst Flood  
559 (GLOF) of Lake Merzbacher Using Dense Chinese High-Resolution Satellite Images,  
560 *Remote Sens.*, 15, 1941, <https://doi.org/10.3390/rs15071941>, 2023.

561 Häusler, H., Ng, F., Kopečný, A., and Leber, D.: Remote-sensing-based analysis of the  
562 1996 surge of Northern Inylchek Glacier, central Tien Shan, Kyrgyzstan,  
563 *Geomorphology*, 273, 292–307, <https://doi.org/10.1016/j.geomorph.2016.08.021>,  
564 2016.

565 Hewitson, B. C. and Crane, R. G.: Climate downscaling: techniques and application,  
566 *Clim. Res.*, 7, 85–95, <https://doi.org/10.3354/cr007085>, 1996.

567 Hugonnet, R., McNabb, R., Berthier, E., Menounos, B., Nuth, C., Girod, L., Farinotti,  
568 D., Huss, M., Dussaillant, I., Brun, F., and Kääb, A.: Accelerated global glacier mass  
569 loss in the early twenty-first century, *Nature*, 592, 726–731,  
570 <https://doi.org/10.1038/s41586-021-03436-z>, 2021.

571 Jenson, A., Amundson, J. M., Kingslake, J., and Hood, E.: Long-period variability in  
572 ice-dammed glacier outburst floods due to evolving catchment geometry, *The*  
573 *Cryosphere*, 16, 333–347, <https://doi.org/10.5194/tc-16-333-2022>, 2022.

574 Kingslake, J. and Ng, F.: Quantifying the predictability of the timing of jökulhlaups  
575 from Merzbacher Lake, Kyrgyzstan, *J. Glaciol.*, 59, 805–818,  
576 <https://doi.org/10.3189/2013JoG12J156>, 2013.

577 Li, D., Shangguan, D., and Huang, W.: Research on the area change of Lake  
578 Merzbacher in the Tianshan Mountains during 1998–2017, *J. Glaciol. Geocryol.*, 42,  
579 1126–1134, <https://doi.org/10.7522/j.issn.1000-0240.2019.0308>, 2020.

580 Li, D., Shangguan, D., Wang, X., Ding, Y., Su, P., Liu, R., and Wang, M.: Expansion  
581 and hazard risk assessment of glacial lake Jialong Co in the central Himalayas by  
582 using an unmanned surface vessel and remote sensing, *Sci. Total Environ.*, 784,  
583 147249, <https://doi.org/10.1016/j.scitotenv.2021.147249>, 2021.

584 Liu, J.: Forecasting on Jökulhlaups in Kunmalike River, and its influence on river water  
585 condition, Southern Tianshan Mts, *Hydrology*, 25–30,  
586 <https://doi.org/10.19797/j.cnki.1000-0852.1993.01.006>, 1993.

587 Liu, J., Cheng, Z., and Su, P.: The relationship between air temperature fluctuation and  
588 Glacial Lake Outburst Floods in Tibet, China, *Quatern. Int.*, 321, 78–87,  
589 <https://doi.org/10.1016/j.quaint.2013.11.023>, 2014.

590 Liu, J., Li, Z., and Liu, Y.: Glacier dammed lake outburst flood in cold season in the  
591 Tien Shan, China and Kyrgyzstan, *Preprints [preprint]*,  
592 <https://doi.org/10.20944/preprints202310.1666.v1>, 2023.

593 Mayr, E., Juen, M., Mayer, C., Usabaliev, R., and Hagg, W.: Modeling Runoff from the  
594 Inylchek glaciers and Filling of Ice-Dammed Lake Merzbacher, Central Tian Shan,

595 Geogr. Ann. A, 96, 609–625, <https://doi.org/10.1111/geoa.12061>, 2014.

596 Muñoz-Sabater, J., Dutra, E., Agustí-Panareda, A., Albergel, C., Arduini, G., Balsamo,  
597 G., Boussetta, S., Choulga, M., Harrigan, S., Hersbach, H., Martens, B., Miralles, D.  
598 G., Piles, M., Rodríguez-Fernández, N. J., Zsoter, E., Buontempo, C., and Thépaut,  
599 J.-N.: ERA5-Land: a state-of-the-art global reanalysis dataset for land applications,  
600 Earth Syst. Sci. Data, 13, 4349–4383, <https://doi.org/10.5194/essd-13-4349-2021>,  
601 2021.

602 Ng, F. and Liu, S.: Temporal dynamics of a jökulhlaup system, *J. Glaciol.*, 55, 651–665,  
603 <https://doi.org/10.3189/002214309789470897>, 2009.

604 Ng, F., Liu, S., Mavlyudov, B., and Wang, Y.: Climatic control on the peak discharge of  
605 glacier outburst floods, *Geophys. Res. Lett.*, 34, L21503,  
606 <https://doi.org/10.1029/2007GL031426>, 2007.

607 Ogier, C., Werder, M. A., Huss, M., Kull, I., Hodel, D., and Farinotti, D.: Drainage of  
608 an ice-dammed lake through a supraglacial stream: hydraulics and thermodynamics,  
609 *The Cryosphere*, 15, 5133–5150, <https://doi.org/10.5194/tc-15-5133-2021>, 2021.

610 Remya, S. N., Nandan, V., Bhattacharya, A., Srinivasalu, P., Mukherjee, K., Govindha  
611 Raj, B., Yackel, J., and Bolch, T.: Glacier calving and moraine collapse triggered the  
612 glacial lake outburst flood in South Lhonak Lake, Indian Himalaya, *Environ. Res.*  
613 *Commun.*, 7, 115026, <https://doi.org/10.1088/2515-7620/ae1936>, 2025.

614 Richardson, S. D. and Reynolds, J. M.: An overview of glacial hazards in the Himalayas,  
615 *Quatern. Int.*, 65–66, 31–47, [https://doi.org/10.1016/S1040-6182\(99\)00035-X](https://doi.org/10.1016/S1040-6182(99)00035-X), 2000.

616 Rounce, D. R., McKinney, D. C., Lala, J. M., Byers, A. C., and Watson, C. S.: A new  
617 remote hazard and risk assessment framework for glacial lakes in the Nepal  
618 Himalaya, *Hydrol. Earth Syst. Sci.*, 20, 3455–3475, [https://doi.org/10.5194/hess-20-](https://doi.org/10.5194/hess-20-3455-2016)  
619 [3455-2016](https://doi.org/10.5194/hess-20-3455-2016), 2016.

620 Sattar, A., Haritashya, U. K., Kargel, J. S., and Karki, A.: Transition of a small  
621 Himalayan glacier lake outburst flood to a giant transborder flood and debris flow,  
622 *Sci. Rep.*, 12, 12421, <https://doi.org/10.1038/s41598-022-16337-6>, 2022.

623 Shangguan, D., Ding, Y., Liu, S., Xie, Z., Pieczonka, T., Xu, J., and Moldobekov, B.:  
624 Quick release of internal water storage in a glacier leads to underestimation of the  
625 hazard potential of glacial lake outburst floods from Lake Merzbacher in central Tian  
626 Shan Mountains: The risk of GLOF in Central Asia, *Geophys. Res. Lett.*, 44, 9786–  
627 9795, <https://doi.org/10.1002/2017GL074443>, 2017.

628 Shiff, S., Helman, D., and Lensky, I. M.: Worldwide continuous gap-filled MODIS land

629 surface temperature dataset, *Sci. Data*, 8, 74, [https://doi.org/10.1038/s41597-021-](https://doi.org/10.1038/s41597-021-00861-7)  
630 00861-7, 2021.

631 Veh, G., Lützow, N., Tamm, J., Luna, L. V., Hugonnet, R., Vogel, K., Geertsema, M.,  
632 Clague, J. J., and Korup, O.: Less extreme and earlier outbursts of ice-dammed lakes  
633 since 1900, *Nature*, 614, 701–707, <https://doi.org/10.1038/s41586-022-05642-9>,  
634 2023.

635 Veh, G., Wang, B., Zirzow, A., Schmidt, C., Lützow, N., Steppat, F., Zhang, G., Vogel,  
636 K., Geertsema, M., Clague, J., and Korup, O.: Progressively smaller glacier lake  
637 outburst floods despite worldwide growth in lake area, *Nat. Water*, 3, 271–283,  
638 <https://doi.org/10.1038/s44221-025-00388-w>, 2025.

639 Wang, X., Wu, K., Jiang, L., Liu, S., Ding, Y., Jiang, Z., and Guo, W.: Wide expansion  
640 of glacial lakes in Tianshan Mountains during 1990–2010, *Acta Geogr. Sin.*, 68, 983–  
641 993, 2013.

642 Xie, Z., Shangguan, D., Zhang, S., Ding, Y., and Liu, S.: Index for hazard of Glacier  
643 Lake Outburst flood of Lake Merzbacher by satellite-based monitoring of lake area  
644 and ice cover, *Global Planet. Change*, 107, 229–237,  
645 <https://doi.org/10.1016/j.gloplacha.2012.05.025>, 2013.

646 Zhang, G., Yao, T., Xie, H., Qin, J., Ye, Q., Dai, Y., and Guo, R.: Estimating surface  
647 temperature changes of lakes in the Tibetan Plateau using MODIS LST data, *J.*  
648 *Geophys. Res.-Atmos.*, 119, 8552–8567, <https://doi.org/10.1002/2014JD021615>,  
649 2014.

650 Zheng, G., Allen, S. K., Bao, A., Ballesteros-Cánovas, J. A., Huss, M., Zhang, G., Li,  
651 J., Yuan, Y., Jiang, L., Yu, T., Chen, W., and Stoffel, M.: Increasing risk of glacial  
652 lake outburst floods from future Third Pole deglaciation, *Nat. Clim. Change*, 11, 411–  
653 417, <https://doi.org/10.1038/s41558-021-01028-3>, 2021.
